1 **Title:** Trait variation between and within Andes and coastal mountain ranges in the iconic South  
2 American tree *Araucaria araucana* in Chile

3  
4 **Authors:** McIntosh, Mariah<sup>\*</sup>; González-Campos, Jorge<sup>2ii</sup>; Demaree, Patrick<sup>3i</sup>; Toro-Salamanca,  
5 Omayra<sup>4iii</sup> Ipinza, Roberto<sup>5ii</sup>; Bustamante-Sánchez, Marcela A.<sup>6iii</sup>; Hasbún, Rodrigo<sup>7iv</sup>; Nelson,  
6 Cara R.<sup>8i</sup>

7 \* Corresponding author

8 <sup>1</sup> mariah.mcintosh@umontana.edu

9 <sup>2</sup> jgonzalez@infor.cl

10 <sup>3</sup> patrick1k1d@gmail.com

11 <sup>4</sup> omayratoro.s@gmail.com

12 <sup>5</sup> robertoipinza@infor.cl

13 <sup>6</sup> mbustamantes@udec.cl

14 <sup>7</sup> rodrigohasbun@udec.cl

15 <sup>8</sup> cara.nelson@mso.umt.edu

16 <sup>i</sup> Department of Ecosystem and Conservation Science, University of Montana. 32 Campus Drive,  
17 Missoula, MT 59812.

18 <sup>ii</sup> Línea de Conservación y Mejoramiento Genético, Instituto Forestal. Camino a Coronel km 7.5,  
19 San Pedro de la Paz, Chile

20 <sup>iii</sup> Laboratorio de Estudios del Antropoceno, Facultad de Ciencias Forestales, Universidad de  
21 Concepción. Victoria 631, Concepción, Chile.

22 <sup>iv</sup> Laboratorio de Epigenética Vegetal, Departamento de Silvicultura, Facultad de Ciencias  
23 Forestales, Universidad de Concepción. Victoria 631, Concepción, Chile.

24

## 25 **Impact Statement**

26 Differentiation in key traits within and among regions guides restoration and conservation efforts  
27 for the iconic Chilean tree *Araucaria araucana*.

28

29 **Key words** *Araucaria araucana*, population trait differentiation, intraspecific trait variation,  
30 ecological restoration, plant materials selection

31

## 32 **Acknowledgements**

33 This study was designed by MM and CN. JG and IR selected seed collection sites and facilitated  
34 seedling germination and growth with a commercial greenhouse. MM, PD, OT, N. Gutierrez,

35 and I. Arguto collected data. MM analyzed the data and wrote the manuscript. All authors helped  
36 with review of the manuscript. Additionally, we acknowledge the Sistema de Monitoreo de  
37 Ecosistemas Forestales Nativos and the Instituto Forestal in Chile for financial and logistical  
38 support of this project. We are grateful to our Mapuche Pewenche partners who contributed to  
39 seed collection for many of our populations. Finally, we thank CMPC and the Carlos Douglass  
40 Nursery for assistance in germinating and growing seedlings. We greatly appreciate the support  
41 of Dr. Patricia Saez Delgado and her lab for providing lab space for data collection. MM was  
42 supported by NSF DGE-184053 and additional scholarships from the University of Montana  
43 Franke College of Forestry and Conservation.

44

45 **Word Count:** 7866

46

#### 47 **Abstract**

48 As global commitments to restoration are underway, science is needed to support capacity to  
49 achieve meaningful gains for ecosystems and human communities. In Chile, identification and  
50 generation of appropriate plant material is a barrier to achieving major restoration goals under  
51 the Paris Climate Agreement. Understanding genetic differentiation among plant populations is  
52 needed to maximize restoration success. For *Araucaria araucana*, a highly threatened iconic  
53 South American tree, this information is greatly needed to guide restoration and conservation  
54 efforts because this species occurs across a strong climate gradient. We grew seedlings from 12  
55 populations of *A. araucana* across its range in Chile in a common garden to assess regional  
56 (coastal versus Andes mountain ranges) and population variation in key plant traits and relate  
57 this variation to environmental variables. We demonstrate that *A. araucana* is differentiated  
58 within regions and populations across its range in Chile by a suite of traits, particularly branch

59 number and length (showing plant architectural differences) and needle width (showing leaf  
60 investment differences). We show that this variation is at least partly explained by climate and  
61 soil variables, with the most variation explained by differences between regions in temperature  
62 annual range. Thus, we recommend that restoration efforts focus on conserving genetic variation  
63 among and within regions and their populations and preventing the translocations of genotypes  
64 between coastal and Andes populations.

## 65 **Introduction**

66 As global ecosystems are increasingly affected by anthropogenic degradation and climate  
67 change, ecological restoration is critically needed to repair ecosystems and support the human  
68 systems that depend on them. Towards that end, countries across the world are making ambitious  
69 restoration commitments. For instance, Chile aims to restore 1 million hectares of degraded land  
70 by 2050 as a part of its Nationally Determined Contribution under the Paris Climate Agreement  
71 (Gobierno de Chile 2020). One of the primary barriers to effective restoration is lack of  
72 understanding of appropriate plant materials (Gann et al. 2019; León-Lobos et al. 2020). To  
73 protect genetic diversity, avoid maladaptation to outplanting sites, and limit negative effects on  
74 adjacent populations, it is important to understand genetic differentiation among and within plant  
75 populations. (Lesica & Allendorf 1999; Kramer & Havens 2009; Breed et al. 2013). This  
76 information, however, is not yet available for many species of conservation concern in general,  
77 and specifically lacking in Chile, limiting restoration capacity (León-Lobos et al. 2020). We  
78 narrow this knowledge gap for the ancient and iconic South American conifer, *Araucaria*  
79 *araucana* (pewen), a tree of high cultural and ecological value in South America. Most genetic  
80 information for this threatened species addresses neutral genetic variation (e.g., Souza et al.  
81 2008, Martín et al. 2014), thus we lack information on adaptive genetic variation (Bekessy et al.  
82 2003). Here, we characterized among- and within-population variation in key plant traits across  
83 the range of pewen in Chile and related overall trait variation to climate and soil variables, which  
84 commonly drive large-scale patterns of differentiation in trees (Alberto et al. 2013). Our work  
85 provides the basis for both understanding patterns of genetic and phenotypic variation across the  
86 range of this species and improving management and restoration capacity.

87

88 As plants are rooted in place and cannot escape environments in which they germinate, they are  
89 often adapted to local conditions and thus genetically and phenotypically differentiated by  
90 environment across their ranges (Leimu & Fischer 2008; Anderson et al. 2011). As a result,  
91 population differentiation is extremely common in plants (Leimu & Fischer 2008) and occurs  
92 across spatial scales from meters (Lekberg et al. 2012) to hundreds of kilometers (Liepe et al.  
93 2016; Supple et al. 2018). For instance, population differentiation has been found in 90% of  
94 forest trees studied (Alberto et al. 2013). It is not surprising that local adaptation is so common,  
95 as it has been shown to improve plant growth, reproduction, and survival at home sites (Joshi et  
96 al. 2001; Leimu & Fischer 2008). If plants are moved to foreign environments outside their range  
97 of local adaptation, population fitness may be low and deleterious effects may occur in adjacent  
98 populations (Lesica & Allendorf 1999; Hufford & Mazer 2003; McKay et al. 2005; Broadhurst  
99 et al. 2008). Thus, understanding genetic differentiation among and within populations of the  
100 same species in key fitness traits is critical to informing conservation and restoration across the  
101 species range (Hufford & Mazer 2003; Broadhurst et al. 2008; Breed et al. 2013; Gann et al.  
102 2019).

103

104 Beyond characterizing patterns of population differentiation, there is considerable interest in  
105 identifying environmental variables that explain these patterns (Reich et al. 1997; Wright et al.  
106 2005; Alberto et al. 2013; Aitken & Whitlock 2013; Anderegg et al. 2016, 2018). Climate  
107 gradients are often considered as drivers of plant population differences (Alberto et al. 2013;  
108 Bower et al. 2014), as plant distribution is strongly driven by climate (Webb 1986; Woodward  
109 1987; Woodward et al. 2004). As a result of provenance studies which have been conducted for  
110 multiple centuries, within species, climate variably explains population differentiation depending

111 on species, traits studied, and the magnitude of climate gradients (Alberto et al. 2013; Griffin-  
112 Nolan et al. 2018). Soil variables may play a role in driving population differentiation that is  
113 equal to or even greater than that of climate, despite soil variables varying at much smaller  
114 spatial scales (Macel et al. 2007; Lekberg et al. 2012; Siefert et al. 2014; Lajoie & Vellend 2015;  
115 Gibson et al. 2019). However, the relative contribution of these factors (and the scale of their  
116 variation) remains unresolved (but see Siefert et al. 2015). Here, we ask which climate and soil  
117 variables best explain multivariate genetic trait differentiation among populations, addressing  
118 large-scale climate versus small-scale soil heterogeneity as drivers of population differentiation.  
119  
120 There is increasing recognition of the importance of maintaining both genetic and phenotypic  
121 variation in species-specific conservation and restoration strategies, especially given anticipated  
122 rapid changes in climate (Kramer & Havens 2009; Breed et al. 2013; Havens et al. 2015; Gann et  
123 al. 2019). Understanding this genetic variation is valuable for managers as genetic variation can  
124 be both the result of previous natural selection and the raw material for future selection in  
125 response to environmental change (Kramer & Havens 2009; Kremer et al. 2012). Furthermore,  
126 understanding the extent to which within-species variation occurs within or among populations  
127 (population versus regional variation) may have implications for the appropriate sourcing of  
128 genetic material for restoration. For example, in a study of the threatened species *Eucalyptus*  
129 *melliodora* in Australia, most genetic variation occurred within versus among populations, and  
130 the authors concluded that seeds could be sourced broadly for restoration (Supple et al. 2018).  
131 Similarly, a high level of within-population variation was identified for a relatively small number  
132 of locally adapted populations of interior spruce complex (*Picea glauca*, *P. engelmannii*, and  
133 their hybrids) and lodgepole pine (*Pinus contorta*) across an area spanning British Columbia and

134 Alberta (>1000 km in latitude and longitude) in Canada (Liepe et al. 2016). Meta-analysis  
135 supports these case studies to show that for trees (particularly those that are wind pollinated), this  
136 pattern of population differentiation across large spatial scales (on the order of hundreds to  
137 thousands of kilometers) and high within-population variation is common, even when gene flow  
138 is significant (Savolainen et al. 2007; Alberto et al. 2013; Liepe et al. 2016). However, the  
139 majority of this information is for temperate forest trees with large ranges (Alberto et al. 2013)  
140 and we don't yet know how species with restricted and fragmented ranges vary among and  
141 within populations.

142  
143 Although understanding drivers and spatial patterns of genetic and phenotypic variation is  
144 generally important for ecosystem management, it is particularly important to have this  
145 information for pewen. There is considerable interest in restoration of this species across its  
146 range and restoration programs are in progress, but lack of information on genetically-based  
147 phenotypic variation (rather than neutral genetic variation, which has been largely resolved; see  
148 (Martín et al. 2014) limits understanding of genetically appropriate material for outplanting and  
149 ability to conserve genetic diversity (León-Lobos et al. 2020). Additionally, this species is  
150 experiencing drought-related mortality that varies among and within regions (Willhite 2019;  
151 Puchi et al. 2021), suggesting that climate and soil conditions may predict survival outcomes and  
152 adding urgency to the need for information on regional and population differentiation for this  
153 species.

154  
155 We studied patterns of among- and within-population genetic variation of pewen across its range  
156 in Chile, in order to improve both ecological understanding and management and restoration of

157 this unique species. Our study is one of only a handful that addresses within-species genetic  
158 variation in a suite of traits rangewide in South American conifers. For pewen, we build on  
159 previous phenotypic and genetic studies in this species that were limited in the number of sites  
160 and traits sampled to assess among- and within-population variation in a broad suite of traits and  
161 relate this variation to climate and soil variables. Specifically, we assessed: whether plants from  
162 populations that experience different climate and soil conditions show trait variation among or  
163 within populations and regions (Andes vs. coastal mountain ranges) (Q1); which plant traits  
164 drive overall differences in phenotypes among and within populations and regions (Q2); and  
165 which climate and soil variables drive overall differences in phenotypes among and within  
166 populations and regions (Q3). Our findings contribute to the growing literature on among- and  
167 within- population variation in trees and uses common methods for developing seed transfer  
168 guidelines to lay the groundwork for developing these important resources for this species.

169

## 170 **Methods**

### 171 *Study System*

172 *Araucaria araucana* (pewen) is native to the coastal and Andean cordilleras of central Chile (37°  
173 31' to 39° 30') and Argentina (37 ° 45' to 40° 20') (Aagesen 1998; Figure 1). The range of  
174 pewen, although relatively small, spans substantial elevation (664-1227 m), precipitation (1100-  
175 2219 mm annual precipitation), and temperature (6.1-9.6 °C mean annual temperature) gradients  
176 (Table 1). *A. araucana* is a dioecious and wind pollinated masting species (Sanguinetti and  
177 Kitzberger 2008). This species is of cultural and spiritual importance to the Mapuche Pewenche  
178 (pewen people), and the sale and consumption of *ngülliw* (the large pinenut-like seeds of pewen)  
179 is important for subsistence (Herrmann 2006). Pewen has been listed as “Endangered” on the



180 IUCN Red List since 2011 (Premoli 2015) due to historic deforestation (although it is now  
181 protected by the government of Chile), invasion by *Pinus contorta* (lodgepole pine), illegal  
182 harvest of seeds (legal for indigenous peoples only), and seed consumption by livestock (Cóbar-  
183 Carranza et al. 2014; Premoli 2015; Tella et al. 2016). Seed regeneration is poor, but vegetative  
184 reproduction may occur (Aagesen 1998). Because its significant climate gradient in Chile and its  
185 ecological and cultural importance, pewen is an excellent study system for addressing  
186 management-relevant questions about patterns and predictors of genetic variation among and  
187 within populations across a species' range.

188

### 189 *Study Populations*

190 We selected 12 sites (referred to hereafter as populations) throughout the range of pewen in both  
191 the Andean and coastal mountain ranges (regions) of Chile spanning altitude and climate  
192 gradients (Table 1, Figure 1). Populations were located within five genetic clusters (two coastal,  
193 three Andean) identified by Martín et al. (2014) using a landscape genetic approach.

194

### 195 *Seed Collection, Seedling Growth, and Trait Measurements*

196 At each population, we collected seeds from trees that were at least 150 m apart and had  
197 available seeds in 2018 at the time of collection. Trees for seed collection were not chosen  
198 randomly, as they had to be producing seeds, and many were chosen nearby roads or trails  
199 because of convenient access (see *Limitations* in Discussion). We referred to seeds from a single  
200 tree at a given population as a family (specifically, they are half sibling families). At each  
201 population, we initially sampled 7-96 families per population depending on site size and  
202 availability; we randomly selected 20 families from each of the 12 populations for inclusion in

203 the study (n=1 seedling per family), except in two populations (Lonquimay and Marimenuco),  
204 where n=7. Additionally, one individual was not measured by accident, reducing n to 19 for this  
205 population (Table 1).

206

207 After cold stratification at 4°C for two months, we cut the end of each seed and submerged them  
208 in water for 2 days at 4°C. Seeds were planted in plastic flats, germinated in a greenhouse in  
209 Yumbel, Chile (-37.098090, -72.562230), and then grown for one year. Seedlings experienced  
210 ambient light conditions and were well-watered (at least once and sometimes more than twice  
211 per day depending on temperature). We were unable to randomize the location of individual  
212 seedlings on benches because of the requirements of the commercial growing facility; however,  
213 we anecdotally noted that the effects of population and family on seedling traits were more  
214 prominent than greenhouse effects (see *Limitations* in Discussion). Germination rate was  
215 measured at 30 weeks, and seedling survival was measured after one year. Plants that were fully  
216 browned were considered dead.

217

218 In December of 2019, we measured a suite of traits to assess variation among and within regions  
219 and populations. Because no information exists on which traits are adaptive for this species, we  
220 selected traits related to seedling growth and biomass allocation, architecture, and leaf economics  
221 that are known to relate to resource use and stress-tolerance strategies (Table 2). We counted the  
222 number of whorls (opposite branches originating from a single point) and branches of each  
223 seedling and measured stem length, basal diameter, and the length of each branch (to calculate a  
224 mean branch length; if there were no branches, branch length was 0). Additionally, we measured  
225 the length and width of the three longest needles to calculate maximum needle lengths and

226 widths (referred to as needle length and width throughout). We measured needle area using the  
227 app LeafByte (Getman-Pickering et al. 2020) and calculated needle mass per area. To measure  
228 needle density, we measured needle volume using the water displacement method (Hughes 2005)  
229 and divided volume by needle mass. Needle thickness was calculated by dividing needle volume  
230 by needle area. Additional descriptions of trait measurements and units are included in Table 2.

231

### 232 *Climate and Soil Variables*

233 We accessed climate and soil variables from WorldClim (Fick & Hijmans 2017), TerraClimate  
234 (Abatzoglou et al. 2018), and SoilGrids (Hengl et al. 2017) databases for the GPS coordinates of  
235 each family (see Table 3 for variables and units). WorldClim data were downloaded directly into  
236 R using the `getData()` function in the package `raster` (Hijmans & Van Etten 2021) in R Studio  
237 version 1.2.5042 (RStudio Team 2020). We extracted data for our coordinates using the `extract()`  
238 function in the package `sp` (Pebesma & Bivand 2005). For TerraClimate data, we used the  
239 `getTerraClim()` function in `climateR` (Johnson 2020) to download and extract data for our  
240 populations. Additionally, we accessed climate variables using regional climate models from the  
241 Center for Climate and Resilience Research at the Universidad de Chile (CR2;  
242 <http://www.cr2.cl/>) but they did not perform better than data from global models, so we excluded  
243 them from final analyses. For SoilGrids data, we used Google Earth Engine to access variables  
244 listed in Table 3.

245

### 246 *Statistical Analysis*

247 As our traits were measured in a common garden, which controls for most environmental  
248 variation, we assume trait differences are due to genetic differences rather than environment. To

249 assess if individual traits varied among regions (coast vs. Andes) and populations (Q1), we used  
250 analysis of variance (ANOVA). For each trait, we ran nested models with region and population  
251 nested within region as factors to address the relative contribution of region and population and  
252 to identify traits which varied among populations and should be included in additional analysis  
253 (Supporting Information). Assumptions of ANOVA were checked using residuals plots and  
254 normal quantile plots. For count traits only (number of whorls, number of branches), we used a  
255 generalized linear model with a Poisson distribution instead of an ANOVA because these traits  
256 were not normally distributed (O'Hara & Kotze 2010). Traits that did not significantly vary  
257 among populations or regions ( $p > 0.05$ ) were not used for additional analyses (see Table 2 and  
258 Supporting Information for a list of the eliminated traits).

259  
260 To address multivariate trait differences among regions and populations (Q1), we used principal  
261 component analysis (PCA) using Bray-Curtis distances with pairwise deletion of missing  
262 observations in the vegan package in R (Oksanen et al. 2019). We used multiple regressions with  
263 PC scores as response variables and traits as predictors to address which traits best explained  
264 overall differences in phenotypes regions and populations (Q2). A separate model was created  
265 for each of the first four PC axes (which explained 94% of variation). To select traits to include  
266 in our models, we used Spearman's  $r$  to identify the traits most correlated with each axis where  $|r|$   
267  $\geq 0.20$  and  $p \geq 0.05$  (Supporting Information). We then excluded traits that covaried with other  
268 traits using the cutoff of  $|r| > 0.60$  (Zuur et al. 2010), selecting traits with higher correlation with  
269 axes scores first and removing less highly correlated traits that covaried. We used backwards  
270 selection to remove additional traits that did not add predictive power to the model using the  
271 `step()` function in R (RStudio Team 2020).

272

273 To address which climate and soil variables best explained overall differences in phenotypes  
274 among regions and populations (Q3), we created separate multiple regression models for each  
275 PC axis using climate and soil variables as predictors. For each of the first three PC axes, we  
276 used Spearman's  $r$  to identify the traits most correlated with each axis where  $|r| \geq 0.20$  and  $p \geq$   
277  $0.05$  (Supporting Information). We used backwards selection to remove additional traits that did  
278 not add predictive power to the model ( $p > 0.05$ ). Overall contribution of climate variables in  
279 explaining trait variation across axes was assessed using PERMANOVA with the `adonis()`  
280 function in `vegan` with pairwise deletion of missing observations (Oksanen et al. 2019).

281

282 All analyses were conducted using RStudio version 1.2.5042 (RStudio Team 2020), and all  
283 figures except Figure 1 were made in R using `ggplot2` (Wickham 2016). Figure 1 was made in  
284 ArcMap.

285

## 286 **Results**

287 *Pewen seedlings from across regions and populations range-wide differ in their traits (Q1)*

288 Plants from different regions (coast and Andes) and populations varied significantly in their traits  
289 (Figure 2, Supporting Information). Across the 16 measured traits, 11 differed significantly to  
290 varying degrees among regions and populations (Figure 2A, Supporting Information). Across all  
291 traits, regions were highly distinct, with coastal populations differing from Andes populations  
292 (Figure 2B) both in PC1 (79.3% of overall variation) and PC2 (9.6% of overall variation).

293 Populations within each region also varied significantly in their traits. For PC1, region accounted  
294 for 9.8% of variation in axis scores ( $p < 0.001$ ) and population accounted for 12.1% of variation

295 (p<0.001) in a nested ANOVA model. For PC2, region accounted for 8.9% of variation  
296 (p<0.001), and population accounted for 1.9% of variation (p<0.001).

297

298 *Branch architecture and needle traits explain overall region and population trait differences*  
299 *(Q2)*

300 Branch architectural and needle traits explain overall trait differences between regions and  
301 among populations. For PC1, number of whorls, needle area, and needle succulence explained  
302 overall trait variation (Adjusted  $R^2 = 0.83$ , p<0.001; Table 4, Supporting Information). Our  
303 model initially included proportion of survival to 1 year; but it did not provide explanatory  
304 power beyond included variables (and was removed per our backwards selection method;  
305  $\Delta AIC=1.7$ ; Supporting Information). The number of branches and branch length were both  
306 highly correlated with the number of whorls (and thus not included in the model; Supplemental  
307 Information); and showed similar patterns among populations as number of whorls (shown in  
308 Figure 2C).

309

310 For PC2, needle width best explained overall trait variation (Adjusted  $R^2=0.04$ , p=0.004; Table  
311 4, Supporting Information), although it explained relatively little variation. No other traits that  
312 were not collinear with needle width were correlated with this axis (where  $|r|>0.20$ ). Needle area  
313 covaried with needle width and showed similar patterns across regions and populations as needle  
314 width (Figure 2D). PC3 (which explained 4.9% of overall trait variation) was best explained by  
315 needle succulence, needle width, and branch length (Adjusted  $R^2=0.88$ , p<0.001; Table 4,  
316 Supporting Information) after removal of survival percentage by backwards selection  
317 ( $\Delta AIC=0.0$ ; Supporting Information). PC4 (which explained 1.8% of overall trait variation) was

318 best explained by needle mass per area, needle length, and needle width (Adjusted  $R^2=0.72$ ,  
319  $p<0.001$ ; Table 4, Supporting Information). No traits were removed from the full model.

320

321 The first two PC axes primarily differentiated Andes and coastal populations (regions) in their  
322 traits (Figure 2B). On average, compared to Andes populations, coastal populations tended to  
323 have more whorls (Figure 2C, Supporting Information) and branches (nearly twice as many) as  
324 well as branches that are on average 1.5x as long. Number of branches and branch length show  
325 similar patterns among regions and populations as number of whorls (shown in Figure 2C).  
326 Significant variation is shown within the Andes region among populations as well as within  
327 populations in these traits. Additionally, coastal populations tended to have smaller and less  
328 succulent needles, with needle area and needle succulence showing similar patterns among  
329 regions and populations as needle width (Figure 2D). Needle trait effect sizes were smaller  
330 compared to branch architectural traits (Supporting Information).

331

332 *Temperature annual range best explained overall region and population trait differences (Q3)*

333 Overall trait differences between regions and among populations were best explained by  
334 temperature annual range (TAR), the difference between maximum temperature in the warmest  
335 month and minimum temperature in the coldest month (Table 5). Additionally, mean vapor  
336 pressure deficit, soil organic carbon, and cation exchange capacity explained small amounts of  
337 variation in minor PC axes (Table 5). However, much trait variation remained unexplained by  
338 environmental variables.

339

340 For PC1, TAR and SOC together explained 10.6% of variation in PC1 scores ( $p < 0.001$ , Table 5).  
341 Our initial model included SWE, OCD, and Silt, but these variables did not provide additional  
342 explanatory power beyond TAR and SOC ( $\Delta AIC = 0.0$ ; Supporting Information). Variation in  
343 PC2 was also best explained by TAR (although only 6.5% of overall variation was explained;  
344 Adjusted  $R^2$ ,  $p < .001$ , Table 5). For PC2, our initial model included MDR (mean diurnal range)  
345 instead of TAR (as Spearman's  $r$  was slightly higher; Supporting Information), but it explained  
346 marginally more variation, so we ultimately used TAR for consistency with our model for PC1  
347 ( $\Delta AIC = -0.5$ ; Supporting Information). For PC3, 13% of variation was explained by mean vapor  
348 pressure deficit ( $p < 0.001$ ) and for PC4, 2.3% of variation was explained by CEC ( $p < 0.001$ ). For  
349 models for PC3 and PC4, no variables were removed from the full models.

350

351 Temperature annual range explains 12.0% of all trait variation ( $p = 0.001$ ) and varies significantly  
352 among regions and populations (Figure 3, Supporting Information). An additional suite of  
353 climate and soil variables covaried with TAR ( $|r| > 0.60$ ) and were thus not included in the  
354 multiple regression models (Supporting Information). Overall, coastal populations tend to have  
355 smaller temperature annual ranges than Andes populations (Figure 3). This is a result of both  
356 higher temperature minimums ( $-1.58 \pm 2.25$  vs.  $-8.00 \pm 0.67$  °C,  $p < 0.01$ ) and lower temperature  
357 maximums ( $19.49 \pm 2.12$  vs.  $23.38 \pm 1.10$  °C,  $p < 0.001$ ).

358

## 359 **Discussion**

360 To identify ecotypes for effective restoration and conservation prioritization of threatened  
361 species, we must understand patterns of genetic variation in phenotypes across a species' range,  
362 especially in relation to climate and soil variables. Therefore, we asked how populations across



363 the range of *pewen*, an iconic South American conifer species of restoration and conservation  
364 concern, varied in a suite of traits between regions and among populations and if this variation  
365 was related to climate and soil variables as expected from evidence in other tree species. Our  
366 results demonstrate that *pewen* differs significantly in a suite of traits among and within regions  
367 and populations across its range in Chile and that this variation is at least partly explained by  
368 climate and soil variables. Temperature annual range, which explained the most trait variation,  
369 also explains genomic differentiation in this species (Varas-Myrik et al. 2021). Thus, our results  
370 highlight the importance of conserving variation among and within regions, informing  
371 conservation strategies and seed sourcing guidelines for restoration.

372

373 *Pewen shows differentiation between regions and populations, with high within-population*  
374 *variation*

375 We found clear genetic differentiation in traits between regions. Coastal populations tended to  
376 have smaller, less succulent leaves and more branches, while Andes populations tended to have  
377 larger, more succulent leaves and fewer branches. Coast to Andes region differences were best  
378 explained by temperature annual range, with higher and lower temperature extremes occurring in  
379 the Andes region. Thus, we show significant variation in plant traits across the range of *pewen* in  
380 Chile, particularly between the coastal and Andes regions, suggesting that *regional* variation  
381 should be conserved. While some trait variation was explained by regional differences,  
382 significant variation was also explained by population differences. This suggests that coastal and  
383 Andean regions are not only differentiated from each other, but populations within regions are  
384 also differentiated from each other and *among-population* variance should be conserved.

385 Additionally, we showed that a large proportion of variation was unexplained by region or  
386 population, suggesting that *within-population* variation should be considered as well.

387

388 *Regional differentiation and high within-population variation is consistent with previous*  
389 *assessments of phenotypic and genetic variation in pewen*

390 Our results are consistent with two previous assessments of trait and genetic variation in pewen,  
391 which also showed substantial differentiation between coastal and Andes regions and high  
392 within-population variation. A phenotypic study of concentrations of alkenes in foliar  
393 epicuticular wax, which may contribute to reducing cuticular water loss as an adaptation to  
394 drought, revealed differences between coastal and Andes populations (Rafii & Dodd 1998).

395 Although only four populations were used, these authors additionally found high within-  
396 population variation in the studied trait. Additional work including nine populations across the  
397 coastal and Andes ranges and into pewen's range in Argentina found that 12% of variation in  
398 carbon isotope discrimination and 14% of variation in root:shoot ratio were explained by region  
399 (coast, Chilean Andes, Argentinian Andes; Bekessy et al. 2002). These patterns were also  
400 corroborated by a study of neutral genetic variation (rather than quantitative genetic variation in  
401 traits as assessed here), which found 16% of total variation explained by the region (coast vs.  
402 Chilean Andes; Martín et al. 2014). Two studies using fewer genetic markers and older  
403 technology did not detect these trends (Bekessy et al. 2003; Ruiz et al. 2007).

404

405 Consistent with other work on this species, we found strong evidence of differentiation among  
406 mountain ranges (regions). Regional differences in traits could be attributed to genetic isolation;  
407 Martín et al. (2014) attributed regional differentiation to geographic isolation among the ranges.

408 The coastal range is thought to have originated long before the Andes range, and pewen is found  
409 on the western slope of the coastal range, a possible barrier to gene flow (as genetic material  
410 would have to travel over the coastal range to reach the Andes or vice versa). We also found  
411 significant variation that was unexplained by region or population (78% and 89% for PC1 and  
412 PC2, respectively; 69% to 95% depending on the trait). In other studies, unexplained trait  
413 variation is commonly assumed to be variation maintained within populations (see *Limitations*  
414 for further discussion). Within-population variation may be highly important given within-  
415 population variation in drought response and subsequent mortality seen in pewen (Puchi et al.  
416 2021).

417

418 *High within-population variation and large-scale regional differentiation are common in forest*  
419 *trees*

420 High within-population variation, maintained by gene flow (particularly in wind-pollinated  
421 species), is not uncommon for forest trees (Kremer et al. 2012; Alberto et al. 2013). For  
422 example, for a small section of the ranges of wind-pollinated ponderosa pine (*Pinus ponderosa*)  
423 and Douglas-fir (*Pseudotsuga menziesii*) in Oregon, United States across two mountain ranges  
424 with about twice the latitudinal gradient and the same longitudinal gradient as our study, *P.*  
425 *menziesii* but not *P. ponderosa* was differentiated between regions. However, both species  
426 showed significantly higher within-population variance compared to among-population variance  
427 (Sorensen & Weber 1994). In addition, similar patterns of low among-population variation and  
428 high within-population variation in a suite of morphological, phenological, and physiological  
429 traits was found in two Northern hemisphere spruces (*Picea glauca*, *P. engelmannii*) and  
430 lodgepole pine (*Pinus contorta*) (Liepe et al. 2016). We did not find additional studies assessing

431 population differentiation in comparable plant traits for other conifers in South America, so we  
432 could not compare our results to other local species.

433

434 *Temperature annual range best explains overall trait variation*

435 Although temperature annual range explained a limited amount of overall trait variation (12%),  
436 this is a substantial amount of variation for just a single climate variable. These findings are  
437 consistent with one other study on this species that addressed relationships with environmental  
438 variables, where TAR best explained genomic differentiation (Varas-Myrik et al. 2021). Usually,  
439 multiple environmental variables play a significant role in explaining multivariate trait variation  
440 across populations (Gibson et al. 2019). In our study, TAR primarily explained regional (coast  
441 vs. Andes) differences; the magnitude of these differences resulted from both increased  
442 minimum and decreased maximum temperatures in the coastal populations, although climate  
443 variables associated with temperature maximums tended to be more highly correlated with both  
444 PC axes. This suggests that temperature minimums and maximums are both important in shaping  
445 population variation in this species. Temperature minimums could explain regional genetic  
446 differences in branch traits, as Andes populations experiencing significant frosts (particularly  
447 those in the northern part of the range) may not be able to support many large branches due to  
448 loss by frost. Temperature maximums could explain regional differences in leaf succulence, with  
449 Andes populations experiencing more severe drought having increased succulence (and leaf size)  
450 to store water under drought conditions.

451

452 Given previous observation of population differentiation in carbon isotope discrimination and  
453 cuticular wax alkenes, two traits related to adaptation to arid environments, it is a little surprising

454 that our populations were not differentiated by precipitation or water availability variables.  
455 However, meta-analysis shows that most plant traits unrelated to water transport are generally  
456 unrelated to precipitation (Griffin-Nolan et al. 2018). Additionally, the lack of explanatory power  
457 of water availability variables could be explained by the relatively small precipitation range of  
458 this species. Further, additional studies in this species show that differential drought mortality  
459 may occur to a greater degree within versus among populations (Puchi et al. 2021).

460

#### 461 *Limitations*

462 Our study has four potential limitations. First, selection of adult trees from which to collect seed  
463 was not randomized, as seed collection was limited due to availability of seed and ease of access.  
464 However, our minimum distance between trees used for seed collection (150m) was greater than  
465 that of other studies (50 and 100 m; Rafii and Dodd 1998, Bekessy et al. 2002) and our  
466 collection sites within populations varied considerably with respect to topography and  
467 microclimate . Thus, we do not feel that this limitation biased results. Second, seedlings were not  
468 randomized in the greenhouse, as they were grown in a commercial nursery and subject to  
469 procedures therein. However, we anecdotally note that we did not observe any greenhouse  
470 effects. Third, we did not replicate within families (trees) in our populations and, therefore,  
471 cannot differentiate between within-population variation and error (although it is a common  
472 practice in the literature to attribute variance unexplained by population to within-population  
473 variation; see Alberto et al. 2013a). If possible, future studies should further replicate within  
474 families to account for within-population variation. Finally, there is no information on which  
475 plant traits might be adaptive for this species, so we selected traits that have been observed to be  
476 important for other species. Thus, we cannot conclude that the variation we identified is

477 adaptive. Future studies are needed to disentangle the traits that are in fact adaptive for this  
478 species. Additional work may also consider assessing response to light availability and other  
479 environmental factors (which could vary among populations as a result of differences in plant  
480 communities).

481

#### 482 *Implications for restoration and conservation of pewen in Chile*

483 As ecological restoration commitments ramp up in Chile and beyond, developing science-based  
484 resources to guide selection of plant materials is key to maximizing outcomes (Lesica &  
485 Allendorf 1999; McKay et al. 2005). In Chile, lack of genetically appropriate seed supply for  
486 restoration is a barrier to achieving restoration goals (León-Lobos et al. 2020), although efforts to  
487 strengthen seed systems are ongoing (Atkinson et al. 2021). Here, we provide valuable  
488 information to complement information on patterns of genomic differentiation (Varas-Myrik et  
489 al. 2021)(unpublished data, Ipinza et al. 2021) and assisted migration (Ipinza & Müller-Using  
490 2021) being developed by colleagues to guide conservation prioritization for this species. Given  
491 that our data show patterns of variation among as well as within regions and populations, we  
492 recommend that restoration efforts aim to collect seed widely within populations across both  
493 coastal and Andes mountain ranges, collecting from as many trees within a population as  
494 possible to sample within-population diversity (to preserve genetic variation; Kramer and  
495 Havens 2009). Additionally, as other studies have concluded, we suggest that managers separate  
496 seeds by provenance, particularly avoiding mixing of coastal and Andes seed sources (to avoid  
497 maladaptation of seed sources to outplanting sites; Lesica and Allendorf 1999, Broadhurst et al.  
498 2008). We emphasize that conservation of existing and future genetic variation (by widespread  
499 seed collection) is necessary to maximize adaptive potential under changing climate, as research

500 indicates this species is at risk within parts of its range (Ipinza & Müller-Using 2021; Varas-  
501 Myrik et al. 2021).

502

503 Finally, our work sets the stage for the development of seed transfer zones, maps that identify  
504 putatively locally adapted ecotypes to guide seed sourcing for restoration (McKay et al. 2005).  
505 These resources are needed as provisional zones (which are not species-specific) are generally  
506 not sufficient (Gibson & Nelson 2017) and will directly build capacity for restoration in Chile,  
507 where collaborators in Chilean management agencies will immediately put them to use. This  
508 work, along with additional studies currently in progress by Chilean collaborators, will improve  
509 conservation and restoration outcomes for this living fossil species.

510

### 511 **Supporting Information**

512 ANOVA models for all traits with region and population as nested factors (Appendix S1), PC  
513 score-trait and -environment correlations (Appendix S2), a figure showing PC score-trait  
514 correlations (Appendix S3), full multiple regression models for traits (Appendix S4), means and  
515 SEs for traits differentiated by region (Appendix S5), full multiple regression models for  
516 environmental variables (Appendix S6), ANOVA models for temperature annual range with  
517 region and population as nested factors (Appendix S7), and a figure showing PC score-  
518 environmental variable correlations (Appendix S7) are available online. The authors are solely  
519 responsible for the content and functionality of these materials. Queries (other than absence of  
520 the material) should be directed to the corresponding author.

521 **Literature Cited**

- 522 Aagesen DL. 1998. On the Northern Fringe of the South American Temperate Forest: The  
523 History and Conservation of the Monkey-Puzzle Tree. *Environmental History* **3**:64.  
524 Available from <https://academic.oup.com/envhis/article-lookup/doi/10.2307/3985427>  
525 (accessed April 12, 2019).
- 526 Abatzoglou JT, Dobrowski SZ, Parks SA, Hegewisch KC. 2018. TerraClimate, a high-resolution  
527 global dataset of monthly climate and climatic water balance from 1958-2015. *Scientific*  
528 *Data* **5**:1–12. Nature Publishing Groups.
- 529 Aitken SN, Whitlock MC. 2013, November 25. Assisted gene flow to facilitate local adaptation  
530 to climate change. *Annual Reviews Inc.* Available from  
531 <https://www.annualreviews.org/doi/abs/10.1146/annurev-ecolsys-110512-135747> (accessed  
532 July 1, 2021).
- 533 Alberto FJ et al. 2013. Potential for evolutionary responses to climate change - evidence from  
534 tree populations. *Global Change Biology* **19**:1645–1661. John Wiley & Sons, Ltd.  
535 Available from <http://doi.wiley.com/10.1111/gcb.12181> (accessed April 1, 2020).
- 536 Anderegg L, Berner LT, Law BE, L Anderegg LD, Badgley G, Sethi ML, HilleRisLambers J.  
537 2018. Within-species patterns challenge our understanding of the leaf economics spectrum  
538 Tree range limits and climate change View project Within-species patterns challenge our  
539 understanding of the leaf economics spectrum. Available from  
540 <https://www.researchgate.net/publication/323968054> (accessed March 31, 2020).
- 541 Anderegg WRL, Klein T, Bartlett M, Sack L, Pellegrini AFA, Choat B, Jansen S. 2016. Meta-  
542 analysis reveals that hydraulic traits explain cross-species patterns of drought-induced tree  
543 mortality across the globe. *Proceedings of the National Academy of Sciences* **113**:5024–



544 5029. Available from <http://www.pnas.org/content/113/18/5024.abstract>.

545 Anderson JT, Willis JH, Mitchell-Olds T. 2011, July 1. Evolutionary genetics of plant  
546 adaptation. Elsevier Current Trends.

547 Atkinson RJ et al. 2021. Seeding resilient restoration: An indicator system for the analysis of tree  
548 seed systems. *Diversity* **13**:1–13.

549 Bekessy SA, Ennos RA, Burgman MA, Newton AC, Ades PK. 2003. Neutral DNA markers fail  
550 to detect genetic divergence in an ecologically important trait. *Biological Conservation*  
551 **110**:267–275.

552 Bekessy SA, Sleep D, Stott A, Menuccini M, Thomas P, Ennos RA, Burgman MA, Gardner MF,  
553 Newton AC. 2002. Adaptation of monkey puzzle to arid environments reflected by regional  
554 differences in stable carbon isotope ratio and allocation to root biomass. *Page Forest*  
555 *Genetics*. Available from [https://www.unep-](https://www.unep-wcmc.org/system/dataset_file_fields/files/000/000/203/original/FG09-1_063-070.pdf?1399378443)  
556 [wcmc.org/system/dataset\\_file\\_fields/files/000/000/203/original/FG09-1\\_063-](https://www.unep-wcmc.org/system/dataset_file_fields/files/000/000/203/original/FG09-1_063-070.pdf?1399378443)  
557 [070.pdf?1399378443](https://www.unep-wcmc.org/system/dataset_file_fields/files/000/000/203/original/FG09-1_063-070.pdf?1399378443) (accessed July 9, 2019).

558 Bower AD, Clair JBS, Erickson V. 2014. Generalized provisional seed zones for native plants.  
559 *Ecological Applications* **24**:913–919. Available from <http://www.jstor.org/stable/24432226>.

560 Breed MF, Stead MG, Ottewell KM, Gardner MG, Lowe AJ. 2013. Which provenance and  
561 where? Seed sourcing strategies for revegetation in a changing environment. *Conservation*  
562 *Genetics* **14**:1–10. Kluwer Academic Publishers. Available from  
563 <https://link.springer.com/article/10.1007/s10592-012-0425-z> (accessed July 1, 2021).

564 Broadhurst LM, Lowe A, Coates DJ, Cunningham SA, McDonald M, Vesk PA, Yates C. 2008.  
565 Seed supply for broadscale restoration: maximizing evolutionary potential. *Evolutionary*  
566 *Applications* **1**:587–597. John Wiley & Sons, Ltd (10.1111). Available from

- 567 <http://doi.wiley.com/10.1111/j.1752-4571.2008.00045.x> (accessed April 3, 2019).
- 568 Cóbar-Carranza AJ, García RA, Pauchard A, Peña E. 2014. Effect of *Pinus contorta* invasion on  
569 forest fuel properties and its potential implications on the fire regime of *Araucaria araucana*  
570 and *Nothofagus antarctica* forests. *Biological Invasions* **16**:2273–2291. Kluwer Academic  
571 Publishers.
- 572 Donohue K, Rubio de Casas R, Burghardt L, Kovach K, Willis CG. 2010. Germination,  
573 Postgermination Adaptation, and Species Ecological Ranges. *Annual Review of Ecology,*  
574 *Evolution, and Systematics* **41**:293–319. Annual Reviews. Available from  
575 <http://www.annualreviews.org/doi/10.1146/annurev-ecolsys-102209-144715> (accessed  
576 April 2, 2020).
- 577 Fick SE, Hijmans RJ. 2017. WorldClim 2: new 1-km spatial resolution climate surfaces for  
578 global land areas. *International Journal of Climatology* **37**:4302–4315. John Wiley and Sons  
579 Ltd. Available from <https://onlinelibrary.wiley.com/doi/full/10.1002/joc.5086>  
580 (accessed June 21, 2021).
- 581 Gann GD et al. 2019. International principles and standards for the practice of ecological  
582 restoration. Second edition. *Restoration Ecology* **27**:S1–S46. Blackwell Publishing Inc.  
583 Available from <https://onlinelibrary.wiley.com/doi/10.1111/rec.13035> (accessed April 13,  
584 2020).
- 585 Getman-Pickering ZL, Campbell A, Aflitto N, Grele A, Davis JK, Ugine TA. 2020. LeafByte: A  
586 mobile application that measures leaf area and herbivory quickly and accurately. *Methods*  
587 *in Ecology and Evolution* **11**:215–221. British Ecological Society. Available from  
588 <https://besjournals.onlinelibrary.wiley.com/doi/full/10.1111/2041-210X.13340> (accessed  
589 June 21, 2021).

- 590 Gibson A, Nelson CR. 2017. Comparing provisional seed transfer zone strategies for a  
591 commonly seeded grass, *pseudoroegneria spicata*. *Natural Areas Journal* **37**:188–199.
- 592 Gibson A, Nelson CR, Rinehart S, Archer V, Eramian A. 2019. Importance of considering soils  
593 in seed transfer zone development: evidence from a study of the native *Bromus marginatus*.  
594 *Ecological Applications* **29**:e01835. Available from  
595 <https://onlinelibrary.wiley.com/doi/abs/10.1002/eap.1835> (accessed April 18, 2019).
- 596 Gobierno de Chile. 2020. Chile’s Nationally Determined Contribution.
- 597 Griffin-Nolan RJ et al. 2018. Trait selection and community weighting are key to understanding  
598 ecosystem responses to changing precipitation regimes. *Functional Ecology* **32**:1746–1756.
- 599 Grime JP. 1977. Evidence for the Existence of Three Primary Strategies in Plants and Its  
600 Relevance to Ecological and Evolutionary Theory. *The American Naturalist* **111**:1169–  
601 1194. University of Chicago Press . Available from  
602 <https://www.journals.uchicago.edu/doi/abs/10.1086/283244> (accessed September 10, 2021).
- 603 Havens K, Vitt P, Still S, Kramer AT, Fant JB, Schatz K. 2015. Seed Sourcing for Restoration in  
604 an Era of Climate Change. *Natural Areas Journal* **35**:122–133. *Natural Areas Journal*.
- 605 Hengl T et al. 2017. SoilGrids250m: Global gridded soil information based on machine learning.  
606 *PLoS ONE* **12**:e0169748. Public Library of Science. Available from  
607 <http://www.isric.org/content/isric-> (accessed June 21, 2021).
- 608 Herrmann TM. 2006. Indigenous Knowledge and Management of *Araucaria Araucana* Forest in  
609 the Chilean Andes: Implications for Native Forest Conservation. *Biodiversity and*  
610 *Conservation* **15**:647–662. Kluwer Academic Publishers. Available from  
611 <http://link.springer.com/10.1007/s10531-005-2092-6> (accessed April 9, 2019).
- 612 Hijmans RJ, Van Etten J. 2021. raster: Geographic analysis and modeling with raster data.

- 613 Hufford KM, Mazer SJ. 2003. Plant ecotypes: genetic differentiation in the age of ecological  
614 restoration. *Trends in Ecology & Evolution* **18**:147–155. Available from  
615 <http://www.sciencedirect.com/science/article/pii/S0169534703000028>.
- 616 Hughes SW. 2005. Archimedes revisited: A faster, better, cheaper method of accurately  
617 measuring the volume of small objects. *Physics Education* **40**:468–474. IOP Publishing.  
618 Available from [www.iop.org/journals/physed](http://www.iop.org/journals/physed) (accessed June 21, 2021).
- 619 Ipinza R, Müller-Using S. 2021. Migración asistida de *Araucaria araucana*. Santiago, Chile.
- 620 Johnson M. 2020. climateR: climateR.
- 621 Joshi J et al. 2001. Local adaptation enhances performance of common plant species. *Ecology*  
622 *Letters* **4**:536–544.
- 623 Kramer AT, Havens K. 2009, November. Plant conservation genetics in a changing world.
- 624 Kremer A et al. 2012. Long-distance gene flow and adaptation of forest trees to rapid climate  
625 change. Pages 378–392 *Ecology Letters*. Available from  
626 <http://doi.wiley.com/10.1111/j.1461-0248.2012.01746.x> (accessed March 15, 2019).
- 627 Lajoie G, Vellend M. 2015. Understanding context dependence in the contribution of  
628 intraspecific variation to community trait–environment matching. *Ecology* **96**:2912–2922.  
629 Ecological Society of America. Available from <http://doi.wiley.com/10.1890/15-0156.1>  
630 (accessed April 1, 2020).
- 631 Leimu R, Fischer M. 2008. A Meta-Analysis of Local Adaptation in Plants. *PLoS ONE* **3**:e4010.  
632 Public Library of Science. Available from <https://dx.plos.org/10.1371/journal.pone.0004010>  
633 (accessed March 31, 2020).
- 634 Lekberg Y, Roskill B, Hendrick MF, Zabinski CA, Barr CM, Fishman L. 2012. Phenotypic and  
635 genetic differentiation among yellow monkeyflower populations from thermal and non-

- 636 thermal soils in Yellowstone National Park. *Oecologia* **170**:111–122. Available from  
637 <http://link.springer.com/10.1007/s00442-012-2297-9> (accessed July 13, 2020).
- 638 León-Lobos P et al. 2020. Lack of adequate seed supply is a major bottleneck for effective  
639 ecosystem restoration in Chile: friendly amendment to Bannister et al. (2018). *Restoration*  
640 *Ecology* **28**:277–281. Blackwell Publishing Inc. Available from  
641 <https://onlinelibrary.wiley.com/doi/abs/10.1111/rec.13113> (accessed April 13, 2020).
- 642 Lesica P, Allendorf FW. 1999. Ecological Genetics and the Restoration of Plant Communities:  
643 Mix or Match? *Restoration Ecology* **7**:42–50. Available from  
644 <http://onlinelibrary.wiley.com/doi/10.1046/j.1526-100X.1999.07105.x/abstract>.
- 645 Liepe KJ, Hamann A, Smets P, Fitzpatrick CR, Aitken SN. 2016. Adaptation of lodgepole pine  
646 and interior spruce to climate: Implications for reforestation in a warming world.  
647 *Evolutionary Applications* **9**:409–419. Wiley-Blackwell. Available from  
648 <http://tinyurl.com/ClimateWNA>. (accessed June 30, 2021).
- 649 Lusk CH, Le-Quesne C. 2000. Branch whorls of juvenile *Araucaria araucana* (Molina) Koch: are  
650 they formed annually? Los verticilos de juveniles de *Araucaria araucana* (Molina) Koch:  
651 ¿son formados anualmente? Page *Revista Chilena de Historia Natural*.
- 652 Macel M et al. 2007. Climate vs. Soil Factors in Local Adaptation of Two Common Plant  
653 Species. *Ecology* **88**:424–433. Available from <http://www.jstor.org/stable/27651115>.
- 654 Mantovani A. 1999. A method to improve leaf succulence quantification. *Brazilian Archives of*  
655 *Biology and Technology* **42**:9–14. Instituto de Tecnologia do Parana.
- 656 Martín MA, Mattioni C, Lusini I, Molina JR, Cherubini M, Drake F, Herrera MA, Villani F,  
657 Martín LM. 2014. New insights into the genetic structure of *Araucaria araucana* forests  
658 based on molecular and historic evidences. *Tree Genetics & Genomes* **10**:839–851.

659 Springer Berlin Heidelberg. Available from <http://link.springer.com/10.1007/s11295-014->  
660 0725-1 (accessed April 12, 2019).

661 McKay JK, Christian CE, Harrison S, Rice KJ. 2005. “How Local Is Local?”-A Review of  
662 Practical and Conceptual Issues in the Genetics of Restoration. *Restoration Ecology*  
663 **13**:432–440.

664 Muñoz AA, Barichivich J, Christie DA, Dorigo W, Sauchyn D, González-Reyes Á, Villalba R,  
665 Lara A, Riquelme N, González ME. 2014. Patterns and drivers of *Araucaria araucana*  
666 forest growth along a biophysical gradient in the northern Patagonian Andes: Linking tree  
667 rings with satellite observations of soil moisture. *Austral Ecology* **39**:158–169. Available  
668 from <http://doi.wiley.com/10.1111/aec.12054> (accessed November 19, 2019).

669 O’Hara RB, Kotze DJ. 2010. Do not log-transform count data. *Methods in Ecology and*  
670 *Evolution* **1**:118–122. Wiley. Available from <http://doi.wiley.com/10.1111/j.2041->  
671 210X.2010.00021.x (accessed March 5, 2021).

672 Oksanen J et al. 2019. *Vegan: Community Ecology Package*.

673 Pebesma EJ, Bivand RS. 2005. *Classes and methods for spatial data in R*.

674 Premoli A. 2015. *Araucaria araucana*, Monkey Puzzle.

675 Puchi PF, Camarero JJ, Battipaglia G, Carrer M. 2021. Retrospective analysis of wood  
676 anatomical traits and tree-ring isotopes suggests site-specific mechanisms triggering  
677 *Araucaria araucana* drought-induced dieback. *Global Change Biology*:1–15.

678 Ráfii ZA, Dodd RS. 1998. Genetic diversity among coastal and Andean natural populations of  
679 *Araucaria araucana* (Molina) K. Koch. *Biochemical Systematics and Ecology* **26**:441–451.

680 Reich PB, Walters MB, Ellsworth DS, Wang Y-P, Oleksyn J. 1997. From tropics to tundra:  
681 global convergence in plant functioning. *Proceedings of the National Academy of Sciences*

682 of the United States of America **94**:13730–4. National Academy of Sciences. Available  
683 from <http://www.ncbi.nlm.nih.gov/pubmed/9391094> (accessed April 15, 2019).

684 RStudio Team. 2020. RStudio: Integrated Development for R. RStudio, Inc., Boston, MA.  
685 Available from <http://www.rstudio.com/>.

686 Ruiz E, González F, Torres-Díaz C, Fuentes G, Mardones M, Stuessy T, Samuel R, Becerra J,  
687 Silva M. 2007. Genetic diversity and differentiation within and among Chilean populations  
688 of *Araucaria araucana* (Araucariaceae) based on allozyme variability. *TAXON* **56**:1221–  
689 1228. Available from <http://doi.wiley.com/10.2307/25065913> (accessed April 12, 2019).

690 Sanguinetti J, Kitzberger T. 2008. Patterns and mechanisms of masting in the large-seeded  
691 southern hemisphere conifer *Araucaria araucana*. *Austral Ecology* **33**:78–87. John Wiley &  
692 Sons, Ltd (10.1111). Available from [http://doi.wiley.com/10.1111/j.1442-](http://doi.wiley.com/10.1111/j.1442-9993.2007.01792.x)  
693 [9993.2007.01792.x](http://doi.wiley.com/10.1111/j.1442-9993.2007.01792.x) (accessed April 9, 2019).

694 Savolainen O, Pyhäjärvi T, Knürr T. 2007. Gene Flow and Local Adaptation in Trees. *Annual*  
695 *Review of Ecology, Evolution, and Systematics* **38**:595–619. Annual Reviews. Available  
696 from <http://www.annualreviews.org/doi/10.1146/annurev.ecolsys.38.091206.095646>  
697 (accessed April 1, 2020).

698 Siefert A et al. 2015. A global meta-analysis of the relative extent of intraspecific trait variation  
699 in plant communities. *Ecology Letters* **18**:1406–1419. John Wiley & Sons, Ltd (10.1111).  
700 Available from <http://doi.wiley.com/10.1111/ele.12508> (accessed March 13, 2019).

701 Siefert A, Fridley JD, Ritchie ME. 2014. Community Functional Responses to Soil and Climate  
702 at Multiple Spatial Scales: When Does Intraspecific Variation Matter? Available from  
703 [www.daymet.org](http://www.daymet.org) (accessed March 2, 2020).

704 Sorensen FC, Weber JC. 1994. Genetic Variation and Seed Transfer Guidelines for *Ponderosa*

705 Pine in the Ochoco and Malheur National Forests of Central Oregon.

706 Supple MA, Bragg JG, Broadhurst LM, Nicotra AB, Byrne M, Andrew RL, Widdup A, Aitken  
707 NC, Borevitz JO. 2018. Landscape genomic prediction for restoration of a Eucalyptus  
708 foundation species under climate change. *eLife* **7**. Available from  
709 <https://elifesciences.org/articles/31835> (accessed April 16, 2019).

710 Tella JL, Lambertucci SA, Speziale KL, Hiraldo F. 2016. Large-scale impacts of multiple co-  
711 occurring invaders on monkey puzzle forest regeneration, native seed predators and their  
712 ecological interactions. *Global Ecology and Conservation* **6**:1–15. Elsevier. Available from  
713 <https://www.sciencedirect.com/science/article/pii/S2351989415300275> (accessed April 12,  
714 2019).

715 Varas-Myrik A, Sepúlveda-Espinoza F, Fajardo A, Alarcón D, Toro-Núñez Ó, Castro-Nallar E,  
716 Hasbún R. 2021. Predicting climate change-related genetic offset for the endangered  
717 southern South American conifer *Araucaria araucana*. Manuscript submitted for publication.

718 Webb T. 1986. Is vegetation in equilibrium with climate? How to interpret late-Quaternary  
719 pollen data. *Vegetatio* **67**:75–91.

720 Wickham H. 2016. *ggplot2: Elegant Graphics for Data Analysis*. Available from  
721 <https://ggplot2.tidyverse.org>.

722 Willhite E. 2019. Observations and Recommendations Regarding *Araucaria araucana* Branch  
723 and Observations and Recommendations Regarding *Araucaria araucana* Branch and Foliage  
724 Mortality ( Daño Foliar de la *Araucaria* ) in the National Parks of South-Central Chile.

725 Witkowski ETF, Lamont BB. 1991. Leaf specific mass confounds leaf density and thickness.  
726 *Oecologia* **88**:486–493. Springer-Verlag. Available from  
727 <http://link.springer.com/10.1007/BF00317710> (accessed November 16, 2019).



- 728 Woodward FI. 1987. *Climate and Plant Distribution*. University of Cambridge Press, New York.
- 729 Woodward FI, Lomas MR, Kelly CK. 2004. Global climate and the distribution of plant biomes.  
730 Pages 1465–1476 *Philosophical Transactions of the Royal Society B: Biological Sciences*.  
731 Royal Society. Available from  
732 <https://royalsocietypublishing.org/doi/abs/10.1098/rstb.2004.1525> (accessed June 22, 2021).
- 733 Wright IJ et al. 2004. The worldwide leaf economics spectrum. Available from  
734 [www.nature.com/nature](http://www.nature.com/nature) (accessed April 15, 2019).
- 735 Wright IJ et al. 2005. Assessing the generality of global leaf trait relationships. *New Phytologist*  
736 **166**:485–496. John Wiley & Sons, Ltd. Available from  
737 <http://doi.wiley.com/10.1111/j.1469-8137.2005.01349.x> (accessed July 6, 2020).
- 738 Zuur AF, Ieno EN, Elphick CS. 2010. A protocol for data exploration to avoid common  
739 statistical problems. *Methods in Ecology and Evolution* **1**:3–14.
- 740

741

742 **Table 1.** Collection sites covering the range of pewen in Chile vary in altitude and climate

743 variables.

| <b>Population</b>                | <b>Region<sup>1</sup></b> | <b>Code<sup>2</sup></b> | <b>Families<sup>3</sup></b> | <b>Latitude</b> | <b>Longitude</b> | <b>Alt.<sup>4</sup></b> | <b>MAP<sup>5,6</sup></b> | <b>MAT<sup>7</sup></b> | <b>TAR<sup>8</sup></b> |
|----------------------------------|---------------------------|-------------------------|-----------------------------|-----------------|------------------|-------------------------|--------------------------|------------------------|------------------------|
| <i>PN<sup>9</sup> Nahuelbuta</i> | Coastal                   | NAH                     | 20                          | -<br>37.805609  | -<br>73.017985   | 1269                    | 1604                     | 6.1                    | 19.9                   |
| <i>Villas Araucarias</i>         | Coastal                   | ARA                     | 20                          | -<br>38.495328  | -<br>73.254247   | 664                     | 1501                     | 8.9                    | 19.4                   |
| <i>RN<sup>10</sup> Ralco</i>     | Andes                     | RAL                     | 20                          | -<br>37.939491  | -<br>71.334323   | 1239                    | 1696                     | 8.8                    | 25.4                   |
| <i>RN Las Nalcas</i>             | Andes                     | NAL                     | 20                          | -<br>38.269358  | -<br>71.489768   | 976                     | 2219                     | 9.6                    | 24.7                   |
| <i>RN Malalcahuello</i>          | Andes                     | MAL                     | 20                          | -<br>38.425844  | -71.56517        | 1382                    | 1765                     | 7.7                    | 24.3                   |
| <i>Lonquimay (*)</i>             | Andes                     | LON                     | 7                           | -<br>38.426427  | -<br>71.421637   | 1376                    | 1632                     | 8.1                    | 24.7                   |
| <i>PN Conguillio</i>             | Andes                     | CON                     | 19                          | -<br>38.647372  | -<br>71.698783   | 1236                    | 1860                     | 7.9                    | 23.6                   |
| <i>PN Huequehue</i>              | Andes                     | HUE                     | 20                          | -<br>39.172097  | -<br>71.707628   | 1378                    | 1464                     | 6.7                    | 23.0                   |
| <i>Cruzaco</i>                   | Andes                     | CRU                     | 20                          | -<br>38.800124  | -<br>71.235559   | 1424                    | 1138                     | 7.9                    | 24.7                   |
| <i>Icalma</i>                    | Andes                     | ICA                     | 20                          | -<br>38.819732  | -<br>71.332654   | 1195                    | 1355                     | 8.7                    | 24.4                   |
| <i>Marimenuco (*)</i>            | Andes                     | MAR                     | 7                           | -<br>38.762456  | -<br>71.184824   | 1401                    | 1110                     | 8.2                    | 24.7                   |
| <i>PN Villarica</i>              | Andes                     | VIL                     | 20                          | -39.569         | -<br>71.514951   | 1187                    | 1145                     | 7.5                    | 23.0                   |

744

<sup>1</sup> Region refers to the mountain range from which the populations were selected (Andes vs. Coastal range, see Figure 1).

<sup>2</sup> Codes refers to populations throughout the manuscript.

<sup>3</sup> Families refer to sample size for each population.

<sup>4</sup> Alt. = altitude (m)

<sup>5</sup> Climate variable means were calculated by accessing WorldClim data for each family's latitude and longitude coordinates (tree from which seeds were sampled) and calculating means at the population level.

<sup>6</sup> MAP = mean annual precipitation (mm)

<sup>7</sup> MAT = mean annual temperature (°C)

<sup>8</sup> TAR = temperature annual range (maximum temperature – minimum temperature; °C)

<sup>9</sup> PN = Parque Nacional

<sup>10</sup> RN = Reserva Nacional

745 **Table 2.** Traits measured in common garden seedlings.

| <b>Trait</b>                 | <b>Description</b>                                                   | <b>Significance and Citations<sup>1</sup></b>                                                                                      |
|------------------------------|----------------------------------------------------------------------|------------------------------------------------------------------------------------------------------------------------------------|
| <i>Aboveground biomass*</i>  | Dry mass of aboveground tissue (g)                                   | Measure of growth, resource allocation; indicative of growth versus stress tolerant strategies (Grime 1977)                        |
| <i>Belowground biomass*</i>  | Dry mass of belowground tissue (g)                                   | Measure of growth, resource allocation; indicative of growth versus stress tolerant strategies (Grime 1977)                        |
| <i>Number of whorls</i>      | Number of whorls of branches                                         | Measure of plant architecture, resource allocation; indicative of growth versus stress tolerant strategies (Lusk & Le-Quesne 2000) |
| <i>Number of branches</i>    | Number of branches                                                   | Measure of plant architecture, resource allocation; indicative of growth versus stress tolerant strategies (Lusk & Le-Quesne 2000) |
| <i>Stem length*</i>          | Length above/belowground tissue separation to top of apical bud (cm) | Measure of growth, resource allocation; indicative of growth versus stress tolerant strategies (Grime 1977)                        |
| <i>Basal diameter*</i>       | Diameter at above/belowground tissue separation (mm)                 | Measure of plant growth, biomass allocation; indicative of growth versus stress tolerant strategies (Lusk & Le-Quesne 2000)        |
| <i>Mean branch length</i>    | Average length of branches (cm)                                      | Measure of plant growth, biomass allocation; indicative of growth versus stress tolerant strategies (Grime 1977)                   |
| <i>Maximum needle length</i> | Average length of longest 3 needles (cm)                             | Component of leaf size; indicative of leaf economic strategy (Wright et al. 2004)                                                  |
| <i>Maximum needle width</i>  | Average width of longest 3 needles (mm)                              | Component of leaf size; indicative of leaf economic strategy (Wright et al. 2004)                                                  |
| <i>Needle area</i>           | Needle area measured using Leaf Byte app (cm <sup>2</sup> )          | Component of leaf size; indicative of leaf economic strategy (Wright et                                                            |

<sup>1</sup> Because no information on adaptive traits exists for pewen, we justify the selection of the measured traits. Associated citations are provided.

\* A star indicates traits were not different among populations as determined by an ANOVA or generalized linear model with a Poisson distribution (see Methods for details). These traits were eliminated from further analyses.

|                                   |                                                                        |                                                                                                                     |
|-----------------------------------|------------------------------------------------------------------------|---------------------------------------------------------------------------------------------------------------------|
|                                   |                                                                        | al. 2004)                                                                                                           |
| <i>Needle mass per area</i>       | Needle dry weight / leaf area (mg/cm <sup>2</sup> )                    | Leaf economics spectrum trait; indicative of leaf economic strategy (Wright et al. 2004)                            |
| <i>Needle succulence</i>          | (Needle fresh weight - dry weight) / needle area (mg/cm <sup>2</sup> ) | Measure of leaf anatomy relating to water storage capacity (Mantovani 1999)                                         |
| <i>Needle thickness</i>           | Needle fresh volume / needle area (mm)                                 | Component of leaf mass per area; indicative of leaf economic strategy (Wright et al. 200(Witkowski & Lamont 1991)4) |
| <i>Proportion germination</i>     | Proportion of seeds that germinated                                    | Measure of seed viability (Donohue et al. 2010)                                                                     |
| <i>Proportion survival (1 yr)</i> | Proportion of seeds that survived to 1 year                            | Measure of survival under greenhouse conditions                                                                     |

746

747

748 **Table 3.** Bioclimatic and soil variables used for multiple regressions with trait PC scores (units  
 749 in parentheses) extracted for the latitude and longitude coordinates of each tree from which seeds  
 750 were sampled.

| <b>Variable</b> | <b>Description</b>                                                                       | <b>Source</b> |
|-----------------|------------------------------------------------------------------------------------------|---------------|
| <i>MAT</i>      | Mean annual temperature (°C)                                                             | WorldClim     |
| <i>MDR</i>      | Mean Diurnal Range (Mean of monthly (max temp - min temp), °C)                           | WorldClim     |
| <i>ISO</i>      | Isothermality (BIO2/BIO7) (×100)                                                         | WorldClim     |
| <i>SEA</i>      | Temperature Seasonality (SD ×100, °C)                                                    | WorldClim     |
| <i>MTWM</i>     | Max Temperature of Warmest Month (°C)                                                    | WorldClim     |
| <i>MTCM</i>     | Min Temperature of Coldest Month (°C)                                                    | WorldClim     |
| <i>TAR</i>      | Temperature Annual Range (TAR; °C)                                                       | WorldClim     |
| <i>MTWQ</i>     | Mean Temp. of Wettest Quarter (°C)                                                       | WorldClim     |
| <i>MTDQ</i>     | Mean Temp. of Driest Quarter(°C)                                                         | WorldClim     |
| <i>MTWaQ</i>    | Mean Temp. of Warmest Quarter (°C)                                                       | WorldClim     |
| <i>MTCQ</i>     | Mean Temp. of Coldest Quarter (°C)                                                       | WorldClim     |
| <i>MAT</i>      | Annual Precipitation (mm)                                                                | WorldClim     |
| <i>PTM</i>      | Precipitation of Wettest Month (mm)                                                      | WorldClim     |
| <i>PDM</i>      | Precipitation of Driest Month (mm)                                                       | WorldClim     |
| <i>PSEA</i>     | Precipitation Seasonality (CV, mm)                                                       | WorldClim     |
| <i>PWQ</i>      | Precipitation of Wettest Quarter (mm)                                                    | WorldClim     |
| <i>PDQ</i>      | Precipitation of Driest Quarter (mm)                                                     | WorldClim     |
| <i>PWaQ</i>     | Precipitation of Warmest Quarter (mm)                                                    | WorldClim     |
| <i>PCQ</i>      | Precipitation of Coldest Quarter (mm)                                                    | WorldClim     |
| <i>AET</i>      | Actual evapotranspiration, derived using a one-dimensional soil water balance model (mm) | TerraClimate  |
| <i>DEF</i>      | Climate water deficit, derived using a one-dimensional soil water balance model (mm)     | TerraClimate  |
| <i>PDSI</i>     | Palmer Drought Severity Index                                                            | TerraClimate  |
| <i>PET</i>      | Reference evapotranspiration (ASCE Penman-Montieth; mm)                                  | TerraClimate  |
| <i>PR</i>       | Precipitation accumulation (mm)                                                          | TerraClimate  |
| <i>RO</i>       | Runoff, derived using a one-dimensional soil water balance model (mm)                    | TerraClimate  |
| <i>SoilM</i>    | Soil moisture, derived using a one-dimensional soil water balance model (mm)             | TerraClimate  |
| <i>SRAD</i>     | Downward surface shortwave radiation (W/m <sup>2</sup> )                                 | TerraClimate  |
| <i>SWE</i>      | Snow water equivalent, derived using a one-dimensional soil water balance model (mm)     | TerraClimate  |
| <i>TMMN</i>     | Minimum temperature (°C)                                                                 | TerraClimate  |
| <i>TMMX</i>     | Maximum temperature (°C)                                                                 | TerraClimate  |

|                 |                                                                                           |              |
|-----------------|-------------------------------------------------------------------------------------------|--------------|
| <i>VAP</i>      | Vapor pressure (kPa)                                                                      | TerraClimate |
| <i>VPD</i>      | Vapor pressure deficit (kPa)                                                              | TerraClimate |
| <i>WS</i>       | Wind-speed at 10m (m/s)                                                                   | TerraClimate |
| <i>BDOD</i>     | Bulk density of the fine earth fraction (kg/dm <sup>3</sup> )                             | SoilGrids    |
| <i>CEC</i>      | Cation Exchange Capacity (cmol(c)/kg)                                                     | SoilGrids    |
| <i>CFVO</i>     | Volumetric fraction of coarse fragments (%)                                               | SoilGrids    |
| <i>Clay</i>     | Proportion of clay particles (<0.002 mm) in the fine earth fraction (%)                   | SoilGrids    |
| <i>Nitrogen</i> | Total Nitrogen (g/kg)                                                                     | SoilGrids    |
| <i>n</i>        |                                                                                           |              |
| <i>PHH20</i>    | Soil pH                                                                                   | SoilGrids    |
| <i>Sand</i>     | Proportion of sand particles (>0.5 mm) in the fine earth fraction (%)                     | SoilGrids    |
| <i>Silt</i>     | Proportion of silt particles ( $\geq 0.002, \leq 0.05$ mm) in the fine earth fraction (%) | SoilGrids    |
| <i>SOC</i>      | Soil organic carbon content in the fine earth fraction (g/kg)                             | SoilGrids    |
| <i>OCD</i>      | Organic carbon density (kg/m <sup>3</sup> )                                               | SoilGrids    |
| <i>OCS</i>      | Organic carbon stocks (kg/m <sup>3</sup> )                                                | SoilGrids    |

751

752

|                       | Coefficients      | Estimate | SE <sup>1</sup>      | t     | p <sup>2</sup> | Adj.<br>R <sup>23</sup> | F (df)               | p <sup>4</sup> |
|-----------------------|-------------------|----------|----------------------|-------|----------------|-------------------------|----------------------|----------------|
| <i>PC1</i><br>(79.3%) | Intercept         | 0.8      | 2.8                  | 0.3   | 0.8            | 0.83                    | 318.7<br>(3,<br>194) | <0.001         |
|                       | Number of whorls  | -16.7    | 0.7                  | 23.7  | <0.001         |                         |                      |                |
|                       | Needle area       | 2.5      | 0.8                  | 3.0   | 0.003          |                         |                      |                |
|                       | Needle succulence | 1.4      | 0.7                  | 2.2   | 0.03           |                         |                      |                |
| <i>PC2</i><br>(9.6%)  | Intercept         | -4.7     | 1.5                  | -3.1  | <0.01          | 0.04                    | 8.6<br>(1,<br>202)   | <0.01          |
|                       | Needle width      | 0.7      | 0.2                  | 2.9   | <0.001         |                         |                      |                |
| <i>PC3</i><br>(4.9%)  | Intercept         | 22.3     | 0.6                  | 38.4  | <0.001         | 0.89                    | 512.9<br>(3,192)     | <0.001         |
|                       | Needle succulence | -3.1     | 0.1                  | -24.7 | <0.001         |                         |                      |                |
|                       | Needle width      | -1.3     | 8.0x10 <sup>-2</sup> | -16.0 | <0.001         |                         |                      |                |
|                       | Branch length     | -0.5     | 2.0x10 <sup>-2</sup> | -23.6 | <0.001         |                         |                      |                |
| <i>PC4</i><br>(1.8%)  | Intercept         | -1.0     | 0.5                  | -1.9  | 0.07           | 0.72                    | 172.6<br>(3, 193)    | <0.001         |
|                       | Needle length     | -4.5     | 0.3                  | -17.4 | <0.001         |                         |                      |                |
|                       | Needle width      | 0.7      | 7.5x10 <sup>-2</sup> | 9.0   | <0.001         |                         |                      |                |

753 **Table 4.** Multiple regression models for traits that explain variation<sup>5</sup> in the first four PC axes.

<sup>1</sup> SE = standard error

<sup>2</sup> P-value for parameters

<sup>3</sup> Adjusted R<sup>2</sup>

<sup>4</sup> P-value for model

<sup>5</sup> Additional traits correlated with these traits that were not included in the model are shown in Supporting Information. Preliminary full models before elimination of variables using backwards selection are shown in Supplemental Table 3.

754 **Table 5.** Multiple regression models for environmental variables that explain variation<sup>1</sup> in the  
 755 first four PC axes.

|                       | Coefficients         | Estimate             | SE                   | t    | p <sup>2</sup> | Adj.<br>R <sup>2</sup> | F (df)            | p <sup>3</sup> |
|-----------------------|----------------------|----------------------|----------------------|------|----------------|------------------------|-------------------|----------------|
| <i>PC1</i><br>(79.3%) | Intercept            | -22.9                | 16.8                 | -1.4 | 0.17           | 0.11                   | 13.4<br>(2, 207)  | <0.001         |
|                       | TAR <sup>4</sup>     | 0.17                 | 4.8x10 <sup>-2</sup> | 3.4  | <0.001         |                        |                   |                |
|                       | SOC <sup>5</sup>     | 1.2x10 <sup>-2</sup> | 5.9x10 <sup>-3</sup> | -2.0 | 0.05           |                        |                   |                |
| <i>PC2</i><br>(9.6%)  | Intercept            | -14.5                | 3.7                  | -4.0 | <0.001         | 0.065                  | 15.8<br>(1, 211)  | <0.001         |
|                       | TAR                  | 6.2x10 <sup>-2</sup> | 1.6x10 <sup>-2</sup> | 4.0  | <0.001         |                        |                   |                |
| <i>PC3</i><br>(4.9%)  | Intercept            | 7.0                  | 1.2                  | 5.6  | <0.001         | 0.13                   | 32.51<br>(1, 211) | <0.001         |
|                       | VPD <sup>6</sup>     | -14.0                | 2.5                  | -5.7 | <0.001         |                        |                   |                |
| <i>PC4</i><br>(1.8%)  | Intercept            | 2.4                  | 1.1                  | 2.4  | 0.02           | 0.023                  | 5.9<br>(1, 208)   | 0.016          |
| CEC <sup>7</sup>      | 8.2x10 <sup>-3</sup> | 3.3x10 <sup>-3</sup> | -2.4                 | 0.02 |                |                        |                   |                |

756

<sup>1</sup> Additional variables that are highly correlated with each axis but are collinear with variables included in the model are shown in Figure 2C. Preliminary full models before elimination of variables using backwards selection are shown in Supplemental Supporting Information.

<sup>2</sup> P-value for parameters

<sup>3</sup> P-value for models

<sup>4</sup> TAR = temperature annual range (°C)

<sup>5</sup> SOC = soil organic carbon (g/kg)

<sup>6</sup> VPD = vapor pressure deficit (kPa)

<sup>7</sup> CEC = cation exchange capacity (cmol(c)/kg)



757 **Figure Legends**

758 **Figure 1.** Map of seed collection sites in Chile. The range of pewen is shown in brown. Study  
759 populations are shown by dots, with colors corresponding to populations as used in subsequent  
760 figures. The common garden site (Yumbel, Chile) is labeled with a triangle.

761  
762 **Figure 2. A)** A suite of traits varies significantly among regions and populations across the range  
763 of pewen in Chile. Adjusted  $R^2$  values (numbers) and p-values (symbols, see legend) for  
764 ANOVA models of plant traits by populations. Only traits for which  $p < 0.05$  are included (see  
765 Table 2 for excluded traits). See Table 2 for trait units. **B)** Traits of pewen vary by region and  
766 population. Mean PCA scores for PCA axes 1 and 2 (percent variation explained in parentheses)  
767 for each population (3-letter codes, see Table 1, Figure 1). Bars show standard errors. **C)** Branch  
768 and needle traits vary among and within regions and populations across the range of pewen in  
769 Chile. Bars show standard errors. Color categories correspond to region (green = Andes, blue =  
770 coast), with gradients by latitude from north (light) to south (dark). Population codes are printed  
771 (see Table 1 for more information on populations).

772  
773 **Figure 3.** Temperature annual range (TAR, °C) varies significantly among regions and  
774 populations. Bars show standard errors. Color categories correspond to region (green = Andes,  
775 blue = coast), with gradients by latitude from north (light) to south (dark). Population codes are  
776 printed (see Table 1 for more information on populations).

777 **Figure 1.** Map of seed collection sites in Chile. The range of pewen is shown in brown. Study  
778 populations are shown by dots, with colors corresponding to populations as used in subsequent  
779 figures. The common garden site (Yumbel, Chile) is labeled with a triangle.

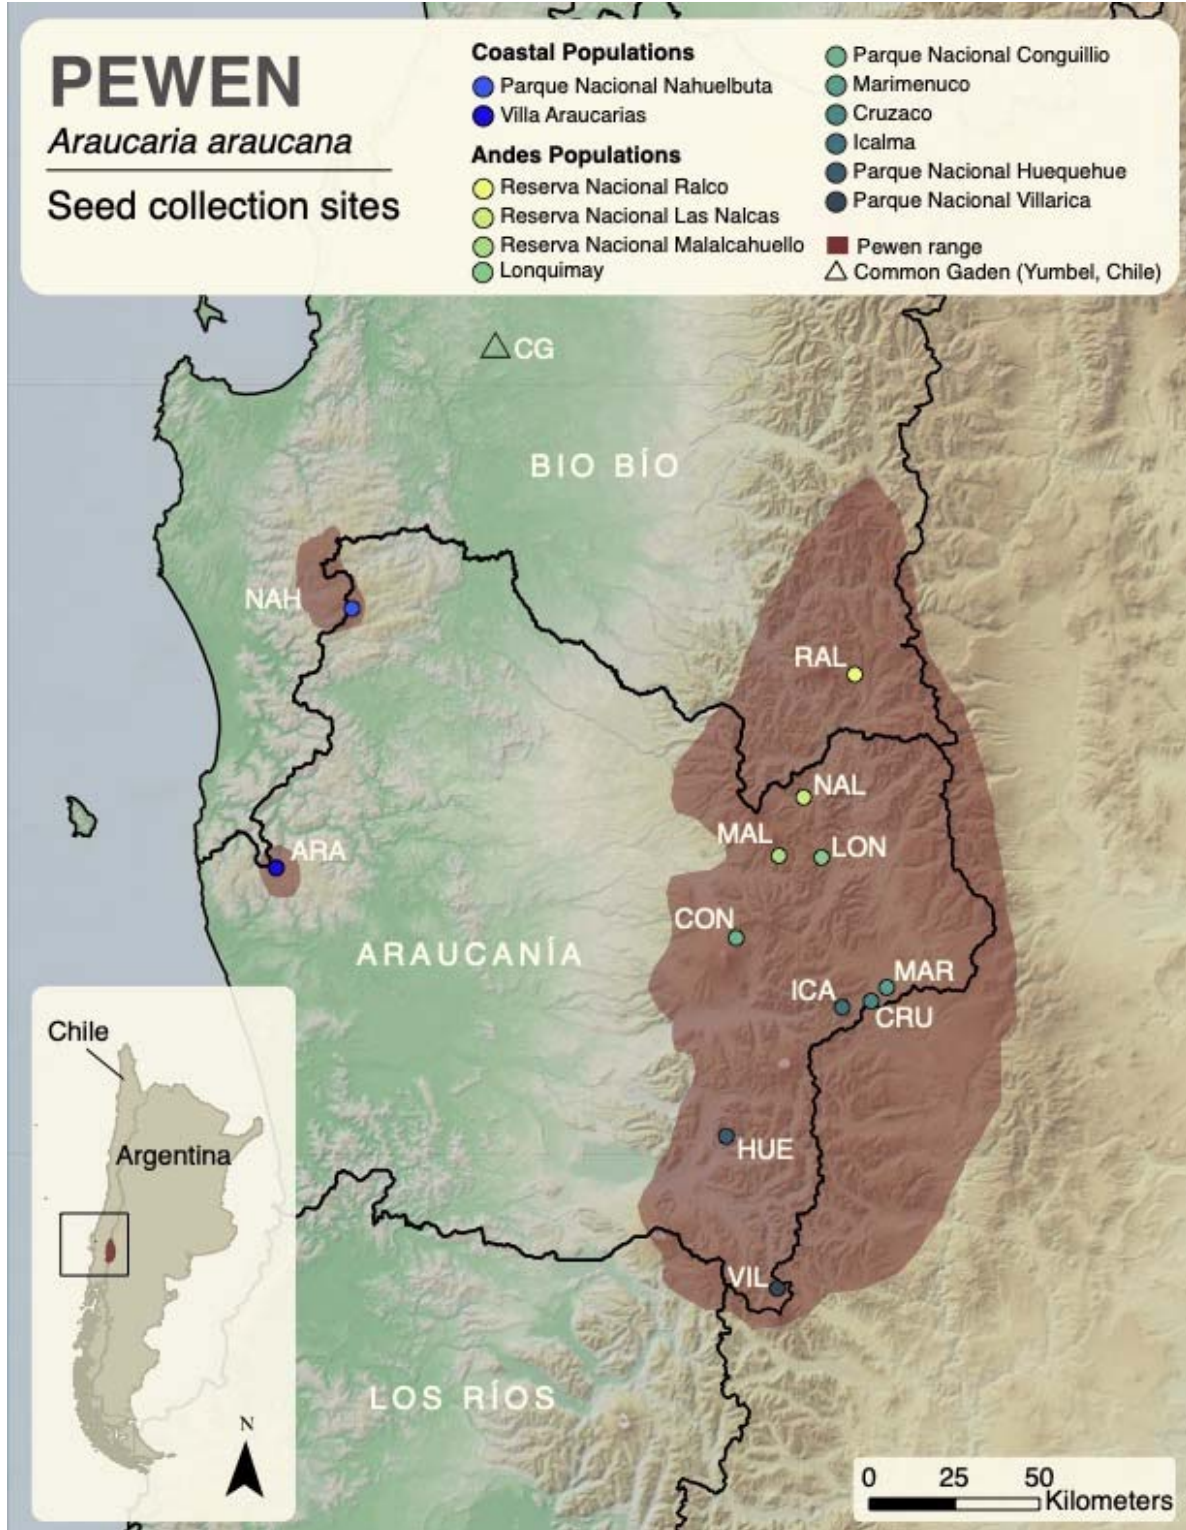

780 **Figure 2. A)** A suite of traits varies significantly among regions and populations across the range  
 781 of pewen in Chile. Adjusted  $R^2$  values (numbers) and p-values (symbols, see legend) for  
 782 ANOVA models of plant traits by populations. Only traits for which  $p < 0.05$  are included (see  
 783 Table 2 for excluded traits). See Table 2 for trait units. **B)** Traits of pewen vary by region and  
 784 population. Mean PCA scores for PCA axes 1 and 2 (percent variation explained in parentheses)  
 785 for each population (3-letter codes, see Table 1, Figure 1). Bars show standard errors. **C)** Branch  
 786 and needle traits vary among and within regions and populations across the range of pewen in  
 787 Chile. Bars show standard errors. Color categories correspond to region (green = Andes, blue =

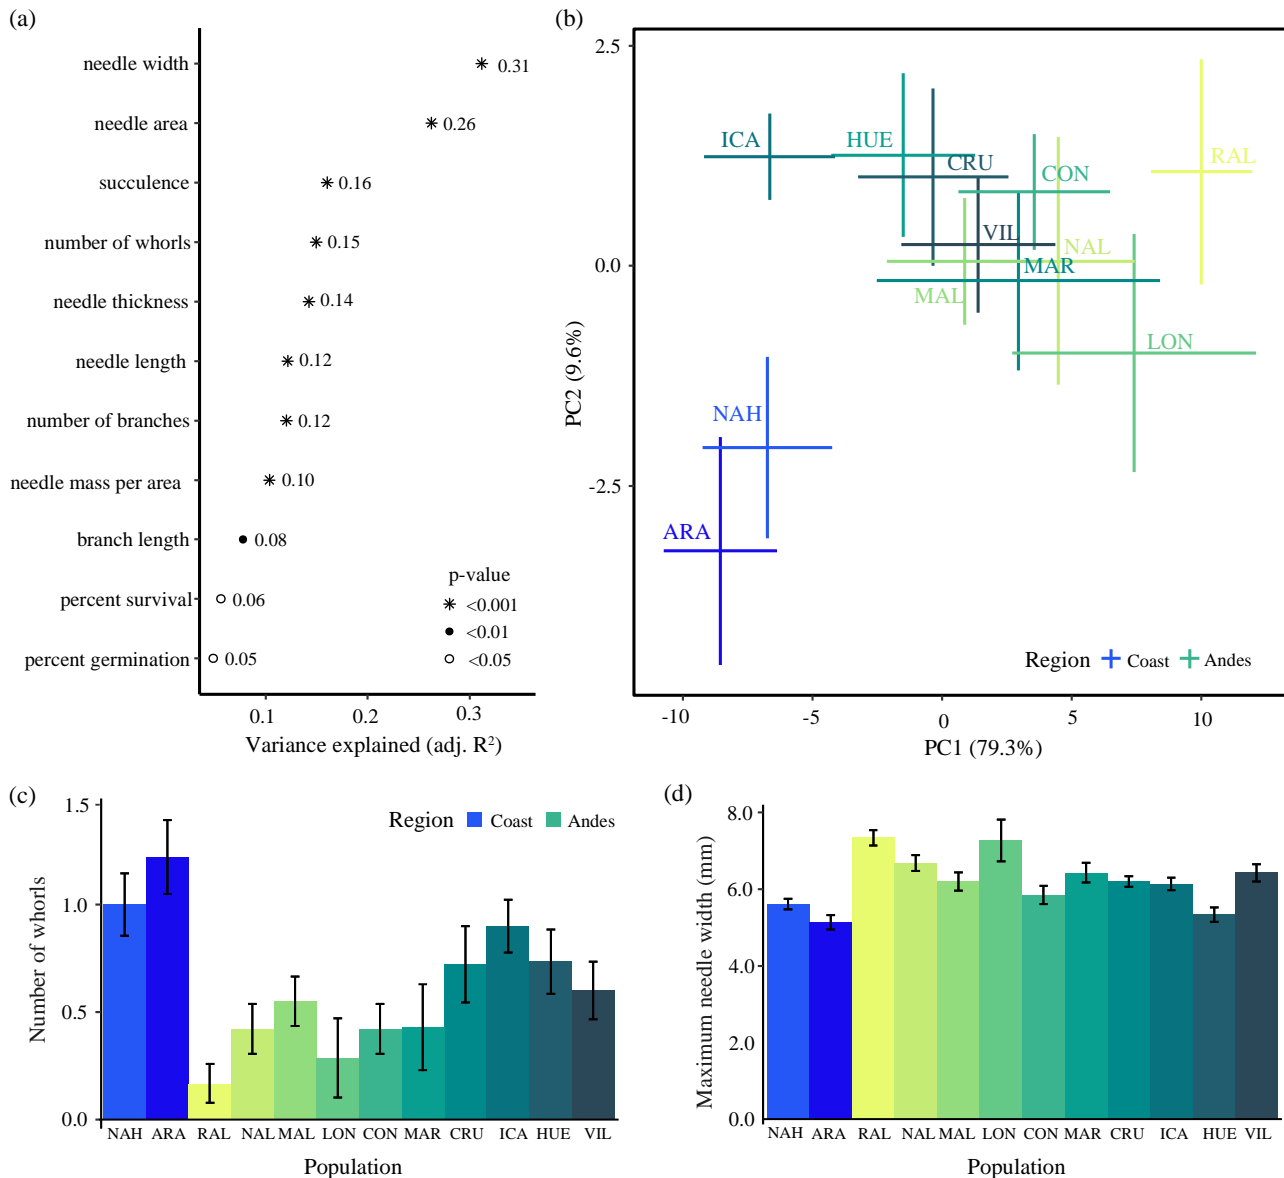

788 coast), with gradients by latitude from north (light) to south (dark). Population codes are printed  
 789 (see Table 1 for more information on populations).

790 **Figure 3.** Temperature annual range (TAR, °C) varies significantly among regions and  
791 populations. Bars show standard errors. Color categories correspond to region (green = Andes,  
792 blue = coast), with gradients by latitude from north (light) to south (dark). Population codes are  
793 printed (see Table 1 for more information on populations).

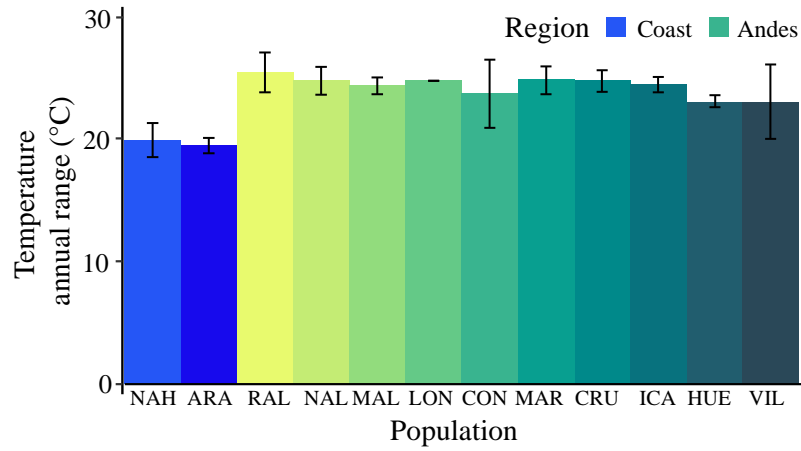

Source: http://biorxiv.org/content/10.1101/2022.01.04.474828v1.full.pdf
